# Supplementary material
Source: HighWire-hosted journal article supplement (https://erj.ersjournals.com/content/55/6/1902363)
Supplement: inline-supplementary-material-1 [file inline-supplementary-material-1.pdf]

# **Oral Corticosteroid Prescription Patterns for Asthma in France, Germany, Italy, and the United Kingdom**

Trung N. Tran<sup>1</sup>, Elizabeth King<sup>2</sup>, Rajiv Sarkar<sup>3</sup>, Cassandra Nan<sup>4</sup>, Annalisa Rubino<sup>5</sup>,  
Caroline O’Leary<sup>2</sup>, Ruvimbo Muzwidzwa<sup>2</sup>, Laura Belton<sup>6</sup>, Jennifer K. Quint<sup>7</sup>

<sup>1</sup>AstraZeneca, Gaithersburg, MD, USA; <sup>2</sup>IQVIA, London, United Kingdom; <sup>3</sup>IQVIA, Bengaluru, India; <sup>4</sup>AstraZeneca, Mölndal, Sweden; <sup>5</sup>Evidera, London, United Kingdom; <sup>6</sup>AstraZeneca, Cambridge, United Kingdom; <sup>7</sup>Imperial College London, London, United Kingdom

## Table of Contents

|                                                                                                     |   |
|-----------------------------------------------------------------------------------------------------|---|
| Supplementary Material 01: Algorithm to Identify High OCS Use .....                                 | 3 |
| Figure S1. Algorithm for Deriving the Rolling 90-Day Window to Identify High<br>OCS Use.....        | 3 |
| Supplementary Material 02.....                                                                      | 4 |
| Table S1. Longitudinal Changes in Average Daily OCS Dosage<br>(Mean mg [SD]) During Follow Up ..... | 4 |
| Supplementary Material 03.....                                                                      | 5 |
| Table S2. Cross-Tabulation of OCS User Status (During Follow Up) by<br>GINA Step at Baseline.....   | 5 |
| Supplementary Material 04.....                                                                      | 6 |
| Table S3. Average OCS Use and Prescription by GINA Severity and Exacerbations....                   | 6 |
| Supplementary Material 05.....                                                                      | 8 |
| Table S4. Baseline Clinical Characteristics of Patients According to OCS Use<br>Category .....      | 8 |

## Supplementary Material 01: Algorithm to Identify High OCS Use

Patients who were prescribed OCS  $\geq 450$  mg (or prednisolone/prednisone equivalent dosage) within a rolling 90-day window during the follow-up period were categorised as high OCS users.

The rolling 90-day window to determine high OCS use was derived algorithmically, as depicted in Figure S1.

The cumulative OCS dosage within any 90-day window was calculated by deriving the total dosage for each OCS prescription and summing the total dosage of all OCS prescriptions within the window. The date at which a patient was considered a high OCS user (high OCS user date) was the date of the first prescription in the sequence that met or exceeded the 450-mg threshold.

**Figure S1. Algorithm for Deriving the Rolling 90-Day Window to Identify High OCS Use**

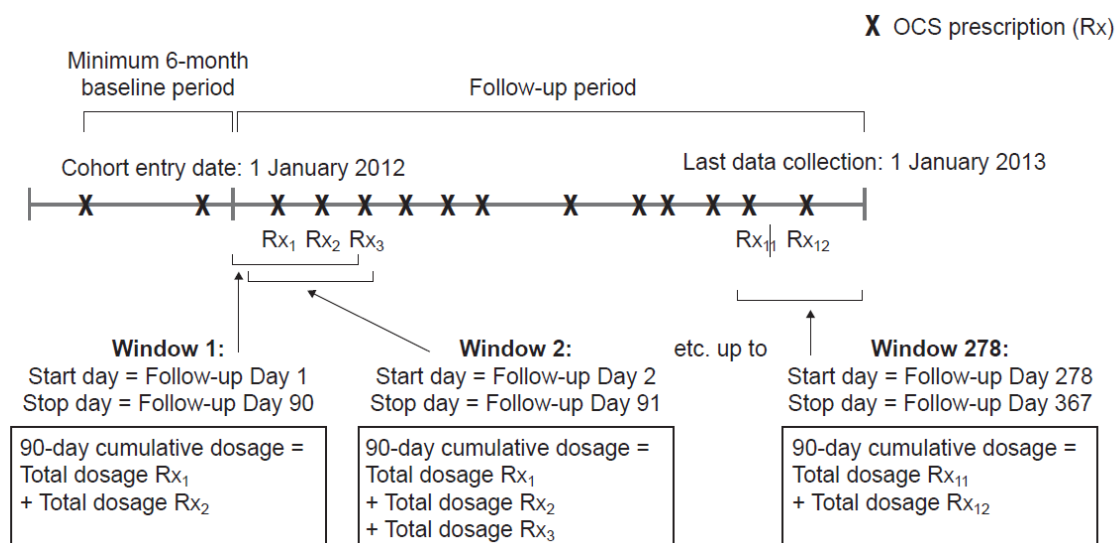

OCS, oral corticosteroids; Rx, prescription.

## Supplementary Material 02

**Table S1. Longitudinal Changes in Average Daily OCS Dosage (Mean mg [SD]) During Follow Up**

| Country                | Day 1 to 90 | Day 91 to 180 | Day 181 to 270 | Day 271 to 360 | Day 361 to 450 | Day 451 to 540 | Day 541 to 630 | Day 631 to 720 |
|------------------------|-------------|---------------|----------------|----------------|----------------|----------------|----------------|----------------|
| UK                     | 8.4 (6.1)   | 2.9 (5.1)     | 2.4 (4.6)      | 2.3 (4.4)      | 2.2 (4.2)      | 2.1 (4.0)      | 2.0 (4.4)      | 2.0 (4.2)      |
| Italy                  | 7.2 (3.7)   | 1.9 (3.7)     | 1.4 (3.3)      | 1.4 (3.0)      | 1.3 (3.0)      | 1.2 (2.8)      | 1.1 (2.8)      | 1.2 (2.8)      |
| France                 | 7.7 (9.4)   | 1.9 (4.9)     | 1.4 (4.5)      | 1.3 (4.0)      | 1.4 (4.6)      | 1.2 (4.1)      | 1.1 (3.5)      | 1.3 (5.5)      |
| Germany GPs            | 10.4 (8.7)  | 2.7 (5.5)     | 2.1 (5.1)      | 1.9 (5.0)      | 2.0 (4.7)      | 1.9 (4.6)      | 1.6 (4.1)      | 1.7 (4.3)      |
| Germany pulmonologists | 8.5 (5.6)   | 1.8 (3.9)     | 1.6 (3.8)      | 1.5 (3.8)      | 1.7 (4.1)      | 1.5 (3.9)      | 1.5 (4.0)      | 1.6 (4.2)      |

GPs, general physicians; OCS, oral corticosteroids; SD, standard deviation; UK, United Kingdom.

### Supplementary Material 03

**Table S2. Cross-Tabulation of OCS User Status (During Follow Up) by GINA Step at Baseline**

| GINA Step, %       | UK               |                 |                     | Italy            |                 |                     | France           |                 |                     | Germany          |                 |                     |                  |                 |                     |
|--------------------|------------------|-----------------|---------------------|------------------|-----------------|---------------------|------------------|-----------------|---------------------|------------------|-----------------|---------------------|------------------|-----------------|---------------------|
|                    |                  |                 |                     |                  |                 |                     |                  |                 |                     | GPs              |                 |                     | Pulmonologists   |                 |                     |
|                    | High OCS<br>user | Low OCS<br>user | Non-<br>OCS<br>user | High OCS<br>user | Low OCS<br>user | Non-<br>OCS<br>user | High OCS<br>user | Low OCS<br>user | Non-<br>OCS<br>user | High OCS<br>user | Low OCS<br>user | Non-<br>OCS<br>user | High OCS<br>user | Low OCS<br>user | Non-<br>OCS<br>user |
| Mild (Steps 1–2)   | 3.4              | 17.8            | 78.8                | 6.0              | 29.0            | 64.9                | 6.6              | 33.1            | 60.4                | 3.6              | 8.4             | 88.0                | 4.2              | 8.5             | 87.3                |
| Moderate (Step 3)  | 5.4              | 23.4            | 71.2                | 7.6              | 29.8            | 62.6                | 8.5              | 35.8            | 55.7                | 5.0              | 8.0             | 87.1                | 6.0              | 10.7            | 13.2                |
| Severe (Steps 4–5) | 15.0             | 31.2            | 53.9                | 12.0             | 30.5            | 57.5                | 11.8             | 37.0            | 51.2                | 12.9             | 10              | 77.1                | 14.7             | 13.2            | 72.2                |

GINA, Global Initiative for Asthma; GPs, general physicians; OCS, oral corticosteroids; UK, United Kingdom.

## Supplementary Material 04

**Table S3. Average OCS Use and Prescription by GINA Severity and Exacerbations**

|                                                              | UK        |            |           |           | Italy     |            |           |           | France    |            |           |           | Germany (GPs) |            |           |            | Germany (pulmonologists) |            |           |           |
|--------------------------------------------------------------|-----------|------------|-----------|-----------|-----------|------------|-----------|-----------|-----------|------------|-----------|-----------|---------------|------------|-----------|------------|--------------------------|------------|-----------|-----------|
|                                                              | Severe    | Non-severe | EX (Y)    | EX (N)    | Severe    | Non-severe | EX (Y)    | EX (N)    | Severe    | Non-severe | EX (Y)    | EX (N)    | Severe        | Non-severe | EX (Y)    | EX (N)     | Severe                   | Non-severe | EX (Y)    | EX (N)    |
|                                                              | 102,416   | 315,321    | 47,908    | 369,829   | 32,539    | 42,984     | 13,498    | 62,025    | 38,979    | 71,939     | 32,724    | 78,194    | 13,174        | 63,839     | 3,270     | 73,743     | 6,528                    | 14,966     | 726       | 20,768    |
| Number of OCS prescriptions per year of follow up, mean (SD) | 0.7 (1.9) | 0.2 (0.8)  | 1.3 (2.7) | 0.2 (0.7) | 0.4 (1.0) | 0.2 (0.7)  | 0.7 (1.5) | 0.2 (0.6) | 0.4 (0.8) | 0.3 (0.6)  | 0.6 (0.9) | 0.2 (0.5) | 0.2 (0.8)     | 0.09 (0.4) | 0.6 (1.3) | 0.09 (0.4) | 0.2 (0.7)                | 0.09 (0.3) | 0.5 (1.2) | 0.1 (0.4) |
| Number of OCS prescriptions per year of follow up, %         |           |            |           |           |           |            |           |           |           |            |           |           |               |            |           |            |                          |            |           |           |
| ≥1                                                           | 17.7      | 5.5        | 30.2      | 5.7       | 10.6      | 6.7        | 20.1      | 5.8       | 13.9      | 9.9        | 21.2      | 7.2       | 7.6           | 2.3        | 21.2      | 2.4        | 7.6                      | 2.1        | 16.0      | 3.4       |
| ≥2                                                           | 9.0       | 2.1        | 17.3      | 2.1       | 4.3       | 2.2        | 8.6       | 1.9       | 4.7       | 2.9        | 7.1       | 2.0       | 4.0           | 0.8        | 9.0       | 1.0        | 3.2                      | 0.7        | 6.5       | 1.3       |
| ≥3                                                           | 5.7       | 1.2        | 11.5      | 1.1       | 2.4       | 1.1        | 5.2       | 0.9       | 2.0       | 1.0        | 2.8       | 0.7       | 2.4           | 0.4        | 4.8       | 0.5        | 1.7                      | 0.3        | 4.0       | 0.6       |
| ≥4                                                           | 4.1       | 0.8        | 8.7       | 0.7       | 1.5       | 0.7        | 3.4       | 0.5       | 0.9       | 0.4        | 1.3       | 0.3       | 1.4           | 0.2        | 3.0       | 0.3        | 0.9                      | 0.1        | 1.9       | 0.3       |
| Average daily OCS dosage, mg                                 |           |            |           |           |           |            |           |           |           |            |           |           |               |            |           |            |                          |            |           |           |
| Mean (SD)                                                    | 0.5 (1.7) | 0.1 (0.6)  | 0.8 (2.0) | 0.1 (0.7) | 0.2 (0.8) | 0.1 (0.4)  | 0.3 (1.0) | 0.1 (0.5) | 0.3 (1.3) | 0.2 (0.6)  | 0.4 (1.2) | 0.2 (0.8) | 0.4 (1.8)     | 0.09 (0.6) | 0.4 (1.6) | 0.1 (0.9)  | 0.3 (1.4)                | 0.1 (0.5)  | 0.5 (1.9) | 0.1 (0.8) |
| Median                                                       | 0         | 0          | 0.1       | 0.0       | 0         | 0          | 0.06      | 0.0       | 0         | 0          | 0.1       | 0.0       | 0             | 0          | 0.07      | 0.0        | 0                        | 0          | 0.0       | 0.0       |
| Average daily OCS dosage, %                                  |           |            |           |           |           |            |           |           |           |            |           |           |               |            |           |            |                          |            |           |           |
| <2.5 mg                                                      | 95.6      | 99.2       | 91.8      | 99.2      | 98.0      | 99.4       | 97.1      | 99.2      | 97.9      | 99.2       | 97.5      | 99.2      | 95.2          | 99.3       | 95.7      | 98.7       | 95.9                     | 99.3       | 93.8      | 98.4      |

|          |     |     |     |     |     |     |     |     |     |     |     |     |     |     |     |     |     |     |     |     |
|----------|-----|-----|-----|-----|-----|-----|-----|-----|-----|-----|-----|-----|-----|-----|-----|-----|-----|-----|-----|-----|
| 2.5–5 mg | 2.2 | 0.5 | 4.3 | 0.5 | 1.3 | 0.4 | 1.8 | 0.5 | 1.4 | 0.7 | 1.8 | 0.5 | 2.4 | 0.5 | 2.5 | 0.7 | 2.3 | 0.6 | 4.3 | 1.0 |
| 5–7.5 mg | 0.9 | 0.2 | 2.1 | 0.1 | 0.5 | 0.1 | 0.7 | 0.2 | 0.3 | 0.1 | 0.3 | 0.1 | 1.1 | 0.1 | 1.0 | 0.3 | 0.9 | 0.1 | 0.6 | 0.3 |
| ≥7.5 mg  | 1.2 | 0.1 | 1.9 | 0.2 | 0.3 | 0.1 | 0.4 | 0.1 | 0.4 | 0.1 | 0.3 | 0.2 | 1.3 | 0.1 | 0.8 | 0.3 | 0.9 | 0.1 | 1.4 | 0.3 |

EX, exacerbations; GINA, Global Initiative for Asthma; GPs, general physicians; OCS, oral corticosteroids; SD, standard deviation; UK, United Kingdom.

## Supplementary Material 05

**Table S4. Baseline Clinical Characteristics of Patients According to OCS Use Category**

| Characteristics                                          | UK (N= 417,737)                |                               |                                | Italy (N=75,523)              |                               |                               | France (N=110,918)            |                               |                               | Germany                       |                              |                               |                                      |                              |                               |
|----------------------------------------------------------|--------------------------------|-------------------------------|--------------------------------|-------------------------------|-------------------------------|-------------------------------|-------------------------------|-------------------------------|-------------------------------|-------------------------------|------------------------------|-------------------------------|--------------------------------------|------------------------------|-------------------------------|
|                                                          |                                |                               |                                |                               |                               |                               |                               |                               |                               | Germany GP (n=77,013)s        |                              |                               | Germany pulmonologists<br>(N=21,494) |                              |                               |
|                                                          | High OCS<br>user<br>(n=28,774) | Low OCS<br>user<br>(n=95,748) | Non-OCS<br>user<br>(n=293,215) | High<br>OCS user<br>(n=6,679) | Low OCS<br>user<br>(n=22,503) | Non-OCS<br>user<br>(n=46,341) | High<br>OCS user<br>(n=9,751) | Low OCS<br>user<br>(n=38,834) | Non-OCS<br>user<br>(n=62,333) | High<br>OCS user<br>(n=4,330) | Low<br>OCS user<br>(n=6,571) | Non-OCS<br>user<br>(n=66,112) | High<br>OCS user<br>(n=1,712)        | Low OCS<br>user<br>(n=2,279) | Non-OCS<br>user<br>(n=17,503) |
| Age [y], Mean (SD)                                       | 52.7 (17.6)                    | 45.6 (18.7)                   | 40.4 (18.8)                    | 54.5<br>(18.0)                | 45.8 (19.0)                   | 45.2 (19.8)                   | 46.4<br>(17.6)                | 42.2 (18.7)                   | 42.3 (20.4)                   | 51.3<br>(17.7)                | 44.7<br>(17.8)               | 42.8 (18.4)                   | 50.5<br>(16.2)                       | 50.1<br>(16.6)               | 46.9 (18.0)                   |
| Female, %                                                | 66.9                           | 64.1                          | 54.1                           | 65.6                          | 61.1                          | 54.1                          | 62.5                          | 63.0                          | 55.3                          | 63.3                          | 59.5                         | 57.3                          | 66.2                                 | 67.9                         | 62.2                          |
| <b>BMI<sup>#</sup> [kg/m<sup>2</sup>]</b>                |                                |                               |                                |                               |                               |                               |                               |                               |                               |                               |                              |                               |                                      |                              |                               |
| Mean (SD)                                                | 29.8 (6.9)                     | 29.0 (6.6)                    | 27.6 (6.1)                     | 27.5 (5.6)                    | 26.9 (5.6)                    | 26.6 (5.5)                    | 28.9 (6.6)                    | 27.2 (6.1)                    | 27.2 (6.3)                    | 28.9 (6.1)                    | 28.5 (6.0)                   | 28.1 (6.2)                    | 27.9 (6.1)                           | 29.0 (6.0)                   | 28.1 (5.7)                    |
| Underweight, %                                           | 1.3                            | 1.4                           | 2.0                            | 2.2                           | 2.9                           | 3.4                           | 2.1                           | 3.4                           | 4.0                           | 2.3                           | 1.3                          | 1.9                           | 0.8                                  | 0                            | 1.2                           |
| Healthy, %                                               | 24.1                           | 28.3                          | 35.9                           | 33.4                          | 37.8                          | 38.9                          | 28.1                          | 37.8                          | 38.6                          | 21.5                          | 28.9                         | 32.8                          | 38.5                                 | 23.6                         | 32.3                          |
| Overweight, %                                            | 32.8                           | 32.8                          | 33.3                           | 36.1                          | 34.3                          | 34.0                          | 31.6                          | 30.8                          | 29.6                          | 39.7                          | 37.9                         | 32.8                          | 30.3                                 | 39.9                         | 33.9                          |
| Obese, %                                                 | 41.8                           | 37.5                          | 28.8                           | 28.4                          | 25.0                          | 23.6                          | 38.2                          | 28.0                          | 27.7                          | 36.5                          | 31.9                         | 32.6                          | 30.3                                 | 36.5                         | 32.6                          |
| <b>Number of exacerbations in the baseline period, %</b> |                                |                               |                                |                               |                               |                               |                               |                               |                               |                               |                              |                               |                                      |                              |                               |
| 0                                                        | 62.8                           | 81.4                          | 93.4                           | 69.5                          | 74.3                          | 87.7                          | 49.0                          | 61.0                          | 79.8                          | 91.1                          | 79.8                         | 97.6                          | 91.5                                 | 91.5                         | 97.8                          |
| 1                                                        | 20.7                           | 15.2                          | 5.9                            | 20.2                          | 20.4                          | 11.0                          | 36.2                          | 32.7                          | 18.5                          | 6.4                           | 17.6                         | 2.2                           | 7.0                                  | 7.9                          | 2.2                           |
| ≥2                                                       | 16.5                           | 3.4                           | 0.7                            | 10.3                          | 5.3                           | 1.3                           | 14.8                          | 6.3                           | 1.7                           | 2.6                           | 2.6                          | 0.1                           | 1.5                                  | 0.5                          | 0.1                           |
| <b>Asthma medication use in the baseline period, %</b>   |                                |                               |                                |                               |                               |                               |                               |                               |                               |                               |                              |                               |                                      |                              |                               |



|                                                  |      |      |      |      |      |      |      |      |      |      |      |      |      |      |      |
|--------------------------------------------------|------|------|------|------|------|------|------|------|------|------|------|------|------|------|------|
| Any ICS medication                               | 85.7 | 79.5 | 67.6 | 84.3 | 79.9 | 78.7 | 67.1 | 60.3 | 55.1 | 69.5 | 58.3 | 59.8 | 80.4 | 78.4 | 71.2 |
| SABA only (inhaled)                              | 8.0  | 15.2 | 27.0 | 6.1  | 9.8  | 12.5 | 10.0 | 16.0 | 24.0 | 15.3 | 18.8 | 28.2 | 4.0  | 6.2  | 7.8  |
| ICS/LABA or ICS+LABA                             | 56.3 | 40.4 | 25.2 | 57.3 | 48.0 | 45.2 | 53.3 | 45.7 | 41.1 | 53.7 | 41.4 | 41.1 | 65.9 | 57.2 | 48.7 |
| ICS/LABA/LAMA or ICS/LABA+LAMA                   | 2.9  | 0.7  | 0.3  | 3.5  | 1.0  | 0.8  | 2.0  | 0.9  | 0.8  | 1.3  | 0.4  | 0.3  | 2.8  | 1.1  | 0.6  |
| Any LTRA                                         | 13.3 | 6.2  | 2.7  | 14.9 | 10.7 | 8.3  | 16.3 | 11.3 | 9.0  | 4.1  | 2.7  | 1.9  | 16.8 | 7.1  | 4.2  |
| Any theophylline                                 | 2.8  | 0.6  | 0.2  | 2.0  | 1.2  | 1.0  | 0.9  | 0.3  | 0.3  | 5.7  | 2.2  | 1.3  | 11.6 | 5.1  | 2.3  |
| Other anti-allergic agents                       | 24.4 | 18.8 | 14.1 | 31.6 | 31.1 | 24.8 | 45.9 | 40.9 | 34.5 | 10.1 | 8.6  | 7.5  | 6.2  | 5.4  | 2.8  |
| <b>Asthma severity in the baseline period, %</b> |      |      |      |      |      |      |      |      |      |      |      |      |      |      |      |
| Mild (GINA Steps 1–2)                            | 20.9 | 32.9 | 47.6 | 28.2 | 40.4 | 43.8 | 32.8 | 41.6 | 47.3 | 32.4 | 50.2 | 52.2 | 20.2 | 30.5 | 40.7 |
| Moderate (GINA Step 3)                           | 25.9 | 33.8 | 33.6 | 13.3 | 15.5 | 15.8 | 20.1 | 21.3 | 20.7 | 28.3 | 29.9 | 32.4 | 23.8 | 31.8 | 32.4 |
| Severe (GINA Steps 4–5)                          | 53.2 | 33.3 | 18.8 | 58.5 | 44.1 | 40.4 | 47.1 | 37.1 | 32.0 | 39.3 | 20.0 | 15.4 | 56.0 | 37.7 | 26.9 |
| <b>Comorbidities, %</b>                          |      |      |      |      |      |      |      |      |      |      |      |      |      |      |      |
| Cardio-cerebrovascular disease                   | 11.5 | 6.7  | 4.3  | 14.5 | 8.0  | 7.6  | 5.8  | 4.5  | 5.1  | 16.6 | 9.7  | 8.4  | 3.8  | 3.7  | 2.2  |
| Cerebrovascular accident – stroke                | 6.0  | 3.5  | 2.4  | 10.1 | 6.1  | 5.6  | 3.1  | 2.7  | 2.9  | 8.2  | 5.0  | 4.3  | 1.2  | 1.4  | 0.8  |
| Heart failure                                    | 4.2  | 2.2  | 1.2  | 4.1  | 1.7  | 1.8  | 1.7  | 1.1  | 1.6  | 8.9  | 4.7  | 4.1  | 2.2  | 1.9  | 1.0  |
| Myocardial infarction                            | 3.4  | 2.0  | 1.3  | 2.0  | 1.0  | 1.1  | 1.5  | 1.0  | 1.2  | 3.2  | 1.8  | 1.7  | 0.7  | 0.7  | 0.6  |
| Renal impairment                                 | 14.6 | 9.0  | 5.9  | 6.9  | 3.7  | 3.3  | 4.3  | 3.7  | 2.6  | 5.0  | 4.1  | 3.3  | 0.3  | 0.1  | 0.1  |
| Type 2 diabetes mellitus                         | 21.1 | 14.0 | 9.6  | 7.0  | 4.9  | 5.6  | 8.0  | 6.0  | 8.3  | 14.6 | 9.8  | 8.9  | 2.0  | 2.7  | 2.1  |
| Glaucoma                                         | 3.7  | 2.4  | 1.7  | 6.2  | 4.3  | 3.5  | 2.3  | 1.7  | 1.7  | 2.4  | 1.6  | 1.3  | 0.8  | 0.7  | 0.5  |
| Osteoporosis                                     | 8.9  | 4.2  | 2.5  | 22.2 | 14.1 | 9.6  | 6.2  | 4.8  | 4.2  | 11.0 | 5.1  | 3.8  | 4.1  | 2.0  | 1.1  |
| Peptic ulcer                                     | 3.4  | 2.2  | 1.5  | 4.3  | 3.1  | 2.4  | 3.9  | 2.6  | 2.3  | 3.2  | 2.2  | 1.9  | 0.4  | 0.3  | 0.1  |
| Pneumonia                                        | 8.8  | 5.2  | 3.5  | 8.6  | 5.0  | 3.7  | 12.2 | 9.6  | 6.4  | 14.0 | 10.0 | 6.7  | 7.8  | 5.8  | 2.5  |

BMI, body mass index; GINA, Global Initiative for Asthma; GPs, general physicians; ICS, inhaled corticosteroids; LABA, long-acting  $\beta_2$ -agonists; LAMA, long-acting muscarinic antagonists; LTRA, leukotriene receptor antagonists; OCS, oral corticosteroids; SABA, short-acting  $\beta_2$ -agonists; SD, standard deviation; UK, United Kingdom; y, years.

<sup>#</sup>BMI is calculated for adult patients only. Underweight ( $<18.5 \text{ kg/m}^2$ ); healthy ( $\geq 18.5$ — $<25 \text{ kg/m}^2$ ); overweight ( $\geq 25$ — $<30 \text{ kg/m}^2$ ); obese ( $\geq 30 \text{ kg/m}^2$ ).
